# Supplementary material for: Lower Fractions of TCF4 Transcripts Spanning over the CTG18.1 Trinucleotide Repeat in Human Corneal Endothelium
Source: MDPI journal article supplement (doi:10.3390/genes12122006), 2021-12-17
Supplement: s1 [file genes-1469066-supplementary.pdf › genes-1469066-supplementary.pdf]

Supplementary Figure S1.

mRNA gene expression of *TCF4* transcripts spanning the (CTG)<sub>n</sub> repeat in WBC

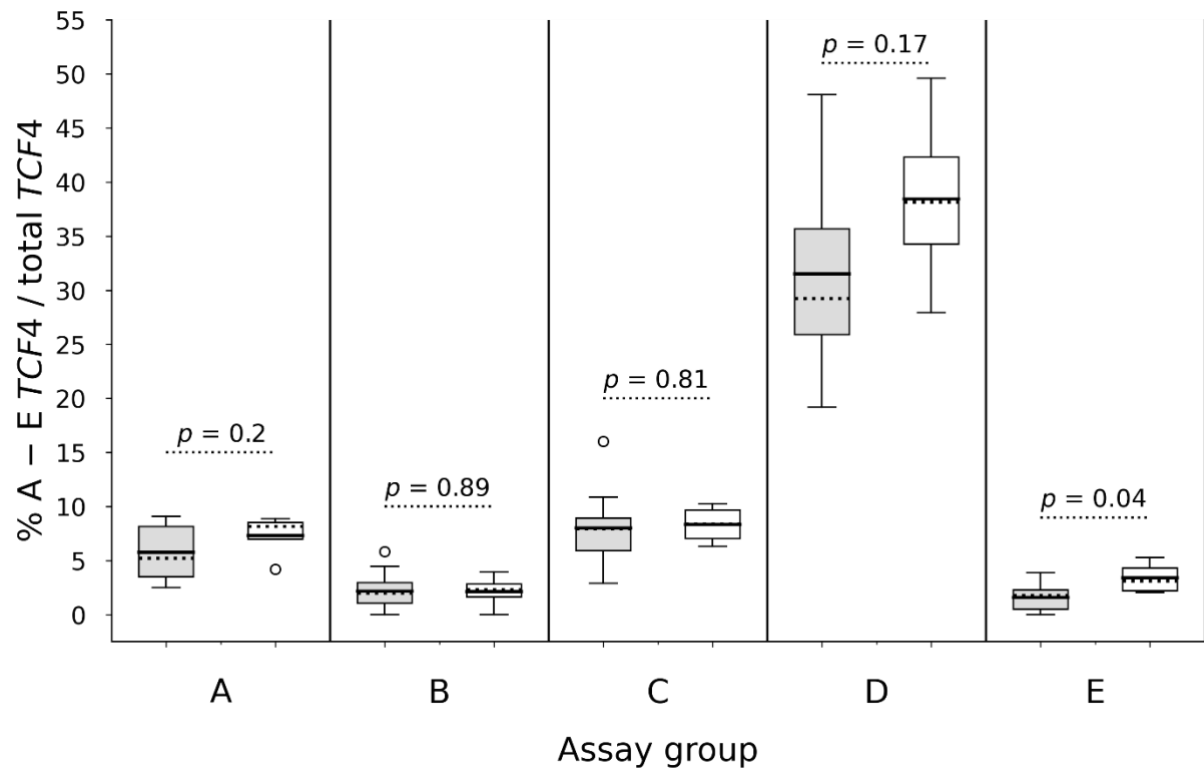

**Figure S1.** mRNA gene expression by TaqMan™ assays A to E targeting *TCF4* transcripts (n=32) spanning the (CTG)<sub>n</sub> repeat (A to D) and transcripts starting immediately at the 3' end of the triplet repeat (E) in FECD *TCF4*<sup>+</sup> WBC (grey) and FECD *TCF4*<sup>-</sup> WBC (white). Within boxes, dotted lines display medians and continuous lines display means. Empty circles display outliers
